# Supplementary material
Source: PubMed Central journal article supplement (PMC7752836)
Supplement: NIHMS1635936-supplement-1.pdf [file NIHMS1635936-supplement-1.pdf]

**Figure S1. Mean pre-dialysis diastolic blood pressure (DBP) over 4 months among participants randomized to the home SBP vs dialysis SBP treatment groups (N=50)**

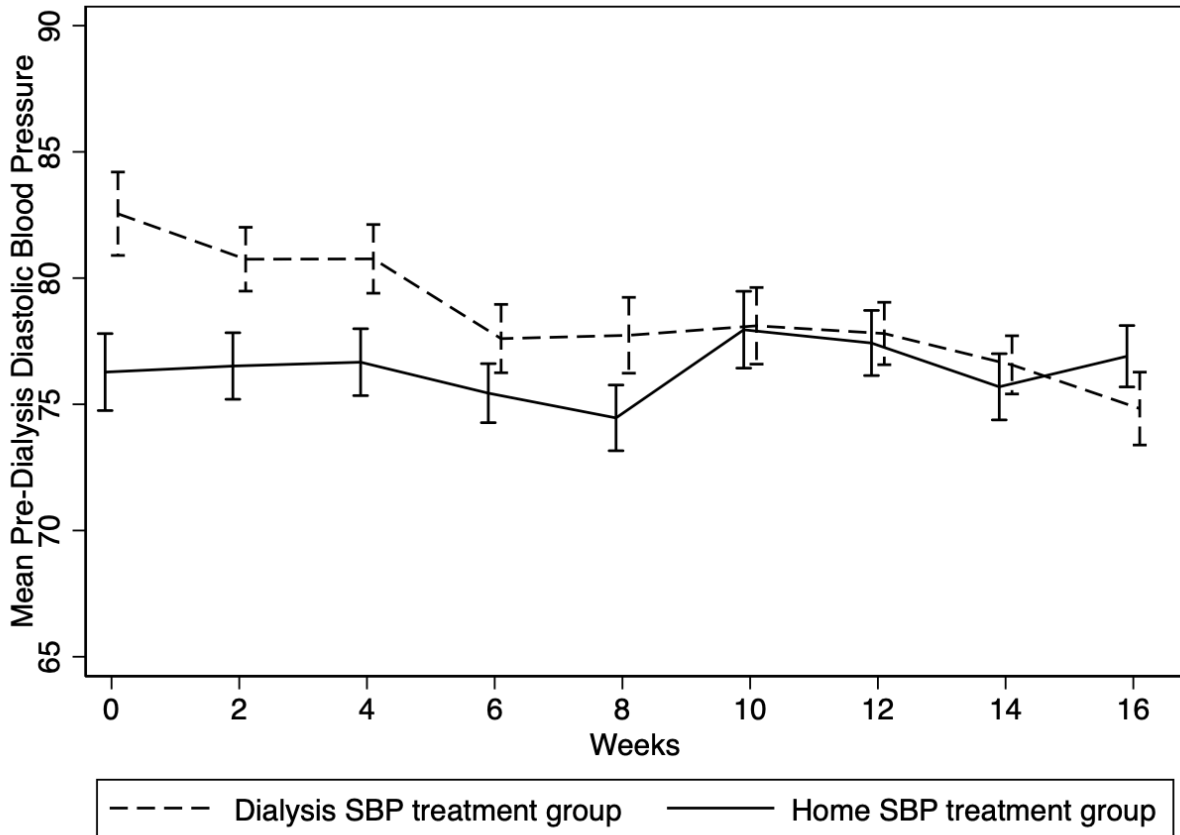

**Figure S2. Mean post-dialysis SBP over 4 months among participants randomized to the home SBP vs dialysis SBP treatment groups (N=50)**

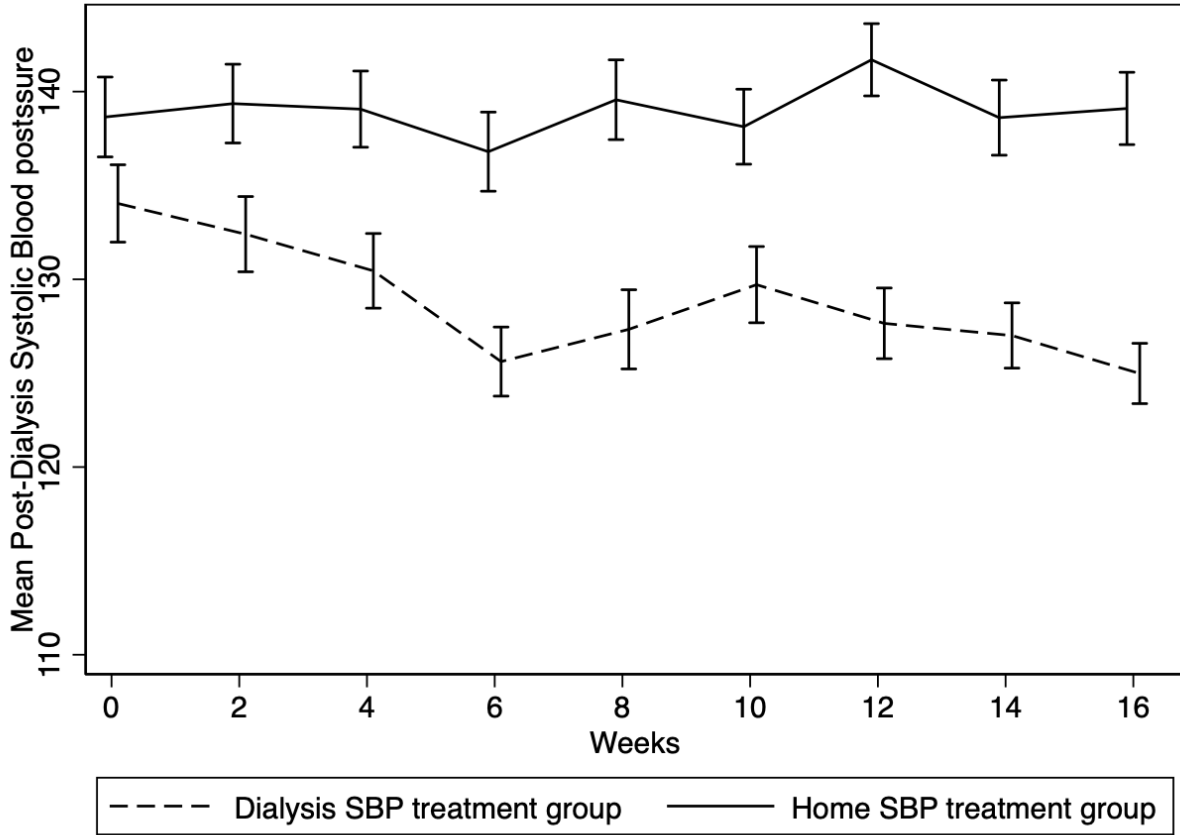

**Figure S3. Mean post-dialysis diastolic blood pressure (DBP) over 4 months among participants randomized to the home SBP vs dialysis SBP treatment groups (N=50)**

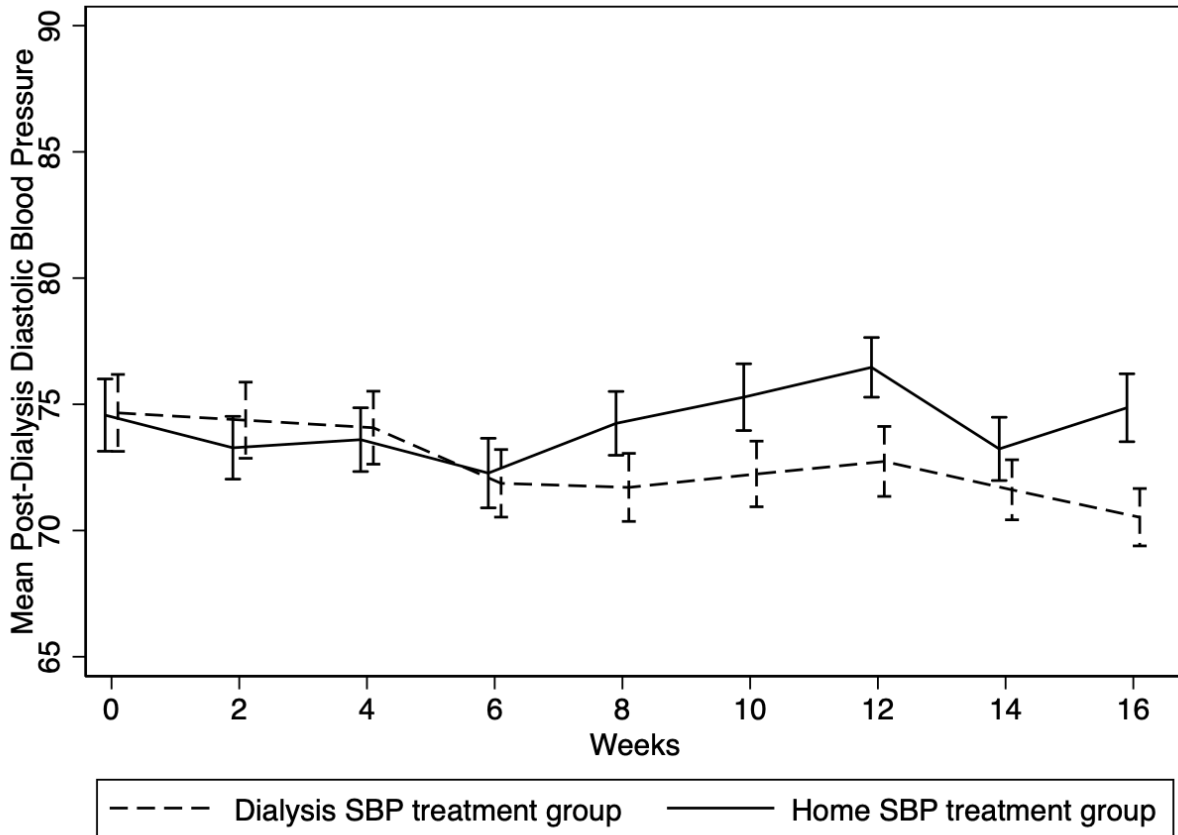

**Figure S4. Mean dry weight target over 4 months among participants randomized to the home SBP vs dialysis SBP treatment groups (N=50)**

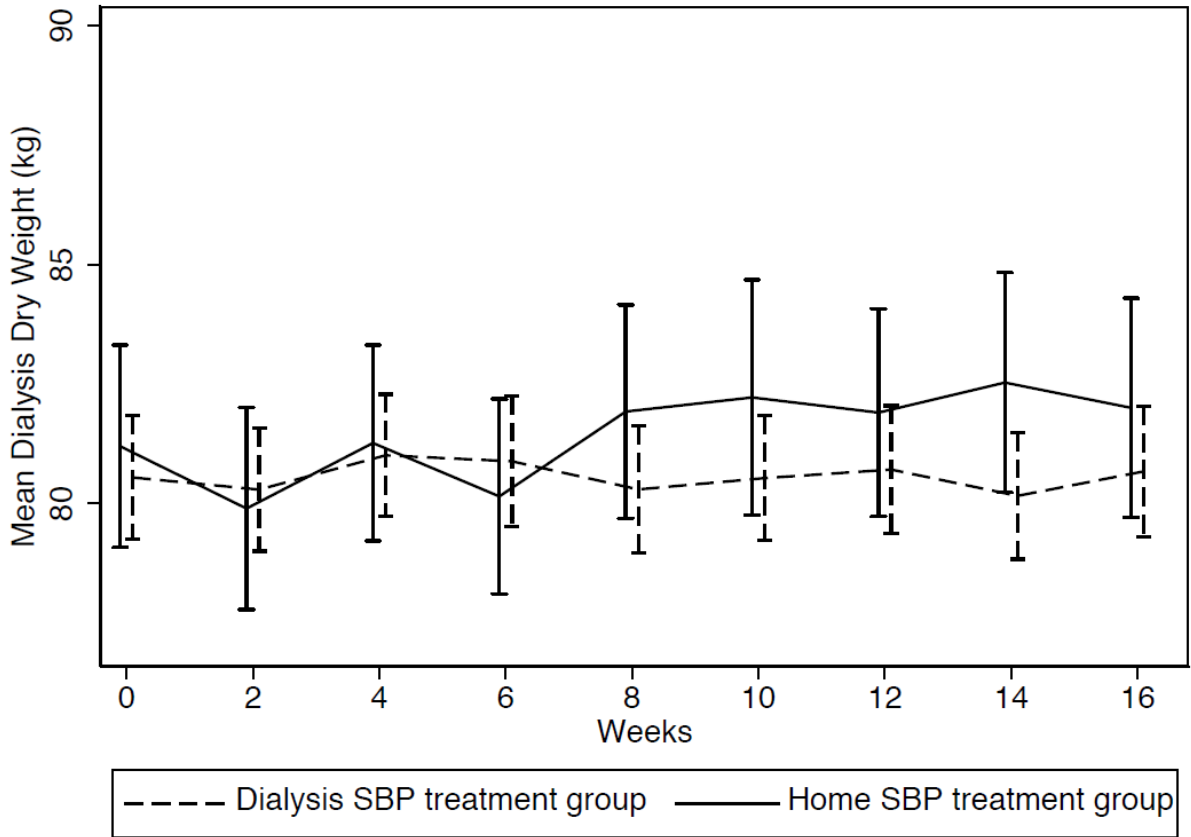

**Figure S5. Mean actual observed pre-dialysis weight over 4 months among participants randomized to the home SBP vs dialysis SBP treatment groups (N=50)**

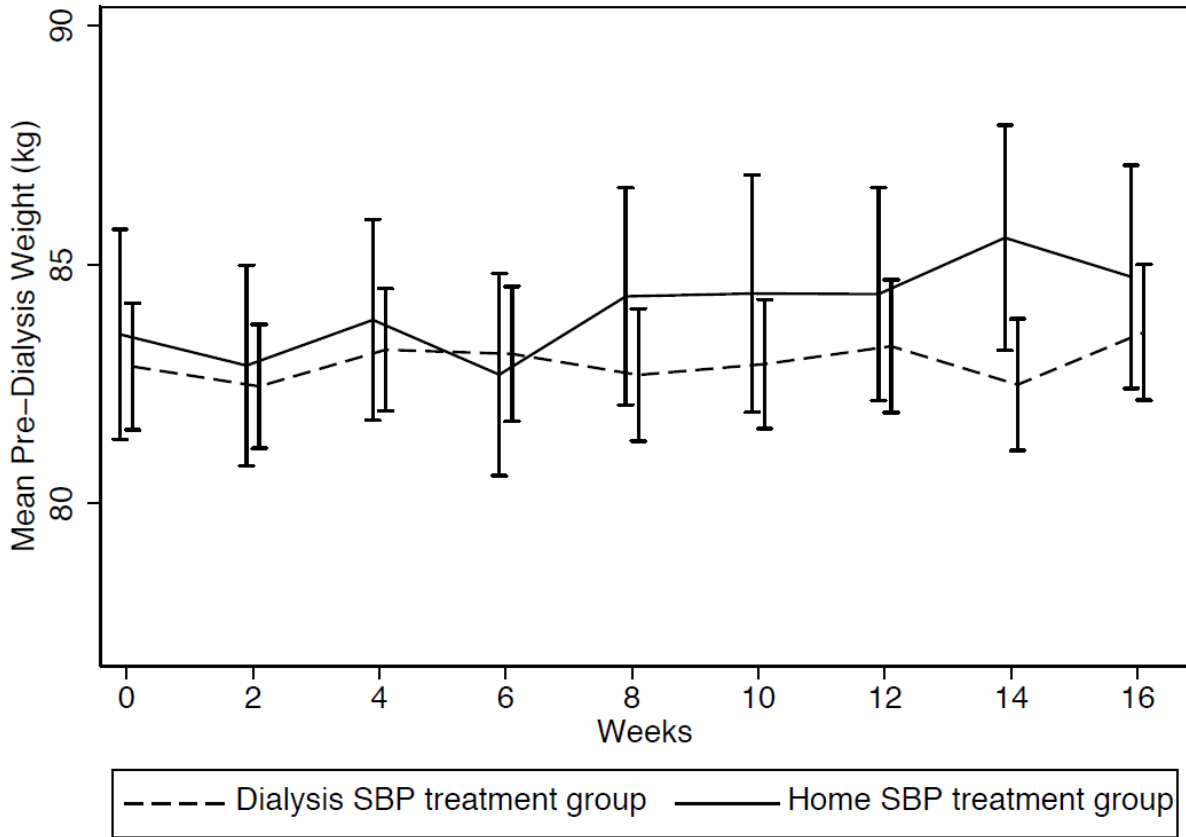

**Figure S6. Mean actual observed post-dialysis weight over 4 months among participants randomized to the home SBP vs dialysis SBP treatment groups (N=50)**

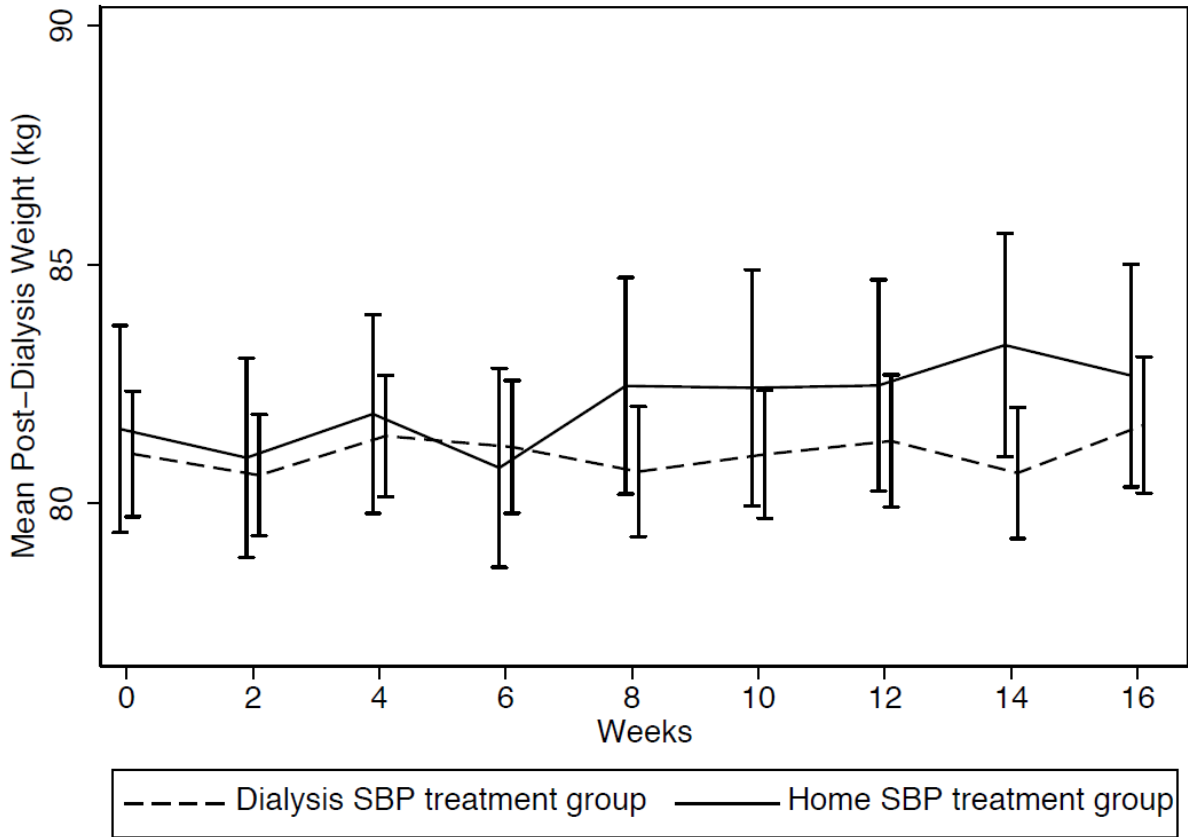

**Table S1. Dry weight and BP medication adjustments over 4 months in both treatment groups**

|                                                                               | <b>Home SBP treatment group</b> | <b>Pre-dialysis SBP treatment group</b> |
|-------------------------------------------------------------------------------|---------------------------------|-----------------------------------------|
| <b>Dry weight</b>                                                             |                                 |                                         |
| Mean ( $\pm$ SD) dry weight at enrollment, kg                                 | 81.1 ( $\pm$ 25.7)              | 80.4 ( $\pm$ 15.8)                      |
| Mean ( $\pm$ SD) Dry weight at end-of study, kg                               | 80.1 ( $\pm$ 26.0)              | 79.0 ( $\pm$ 15.9)                      |
| Median (IQR) # of dry weight adjustments per person over 4 months             | 2 (1-3)                         | 1 (0-2)                                 |
| <b>BP medications</b>                                                         |                                 |                                         |
| Mean ( $\pm$ SD) # of BP medications per person at enrollment                 | 2.4 $\pm$ (1.7)                 | 1.8 ( $\pm$ 1.5)                        |
| Mean ( $\pm$ SD) # of BP medications per person at end-of study               | 2.3 ( $\pm$ 1.9)                | 1.9 ( $\pm$ 1.5)                        |
| Mean ( $\pm$ SD) # of BP medication dose adjustments per person over 4 months | 0.8 ( $\pm$ 1.1)                | 0.5 ( $\pm$ 1.0)                        |
| Mean ( $\pm$ SD) # of BP medication additions per person over 4 months        | 0.3 ( $\pm$ 0.6)                | 0.2 ( $\pm$ 0.4)                        |
| Mean ( $\pm$ SD) # of BP medication removal per person over 4 months          | 0.6 ( $\pm$ 1.2)                | 0.2 ( $\pm$ 0.4)                        |

**Table S2. Concordance of home BP and 44-hour ABPM measures at baseline**

| Home BP vs. 44h ABPM* |      |          |      |
|-----------------------|------|----------|------|
|                       |      | 44h ABPM |      |
|                       |      | <140     | ≥140 |
| HBPM                  | <140 | 6        | 2    |
|                       | ≥140 | 1        | 7    |

\*McNamar's test for discordance, p-value=0.564



**Table S3. Blood pressure measures by 44-hour ambulatory blood pressure monitoring**

|                                               | <b>Visit 1 (baseline)</b> | <b>Visit 9 (final study visit)</b> |
|-----------------------------------------------|---------------------------|------------------------------------|
| <b>Home SBP treatment group (N=12)</b>        |                           |                                    |
| Mean ( $\pm$ SD) 44-hour SBP, mmHg            | 141 ( $\pm$ 17)           | 137 ( $\pm$ 17)                    |
| Mean ( $\pm$ SD) daytime SBP, mmHg            | 143.1 (16.0)              | 137.5 (16.1)                       |
| Mean ( $\pm$ SD) nighttime SBP, mmHg          | 137.5 (22.9)              | 132.9 (19.8)                       |
| Non-dippers*, N (%)                           | 10 (83%)                  | 8 (67%)                            |
| <b>Pre-dialysis SBP treatment group (N=9)</b> |                           |                                    |
| Mean ( $\pm$ SD) 44-hour SBP, mmHg            | 130 ( $\pm$ 19.7)         | 127 ( $\pm$ 21)                    |
| Mean ( $\pm$ SD) daytime SBP, mmHg            | 132.9 (18.8)              | 128.6 (21.8)                       |
| Mean ( $\pm$ SD) nighttime SBP, mmHg          | 127.0 (27.3)              | 126.9 (25.3)                       |
| Non-dippers*, N (%)                           | 6 (67%)                   | 8 (89%)                            |

\*Non-dipping was defined as a failure of the systolic blood pressure to decline by at least 10% while sleeping
